# Supplementary material
Source: PubMed Central journal article supplement (PMC2930684)
Supplement: supp_M110.147041_jbc.M110.147041-1.pdf [file supp_M110.147041_jbc.M110.147041-1.pdf]

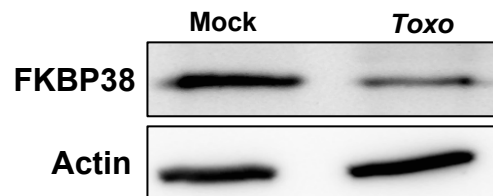

**Supplemental Figure S1: *Toxoplasma* Has No Effect on FKBP38 Protein Levels.** Lysates from mock or parasite-infected HFFs were Western blotted to detect FKBP38 or actin. Shown is a representative blot from three independent experiments.

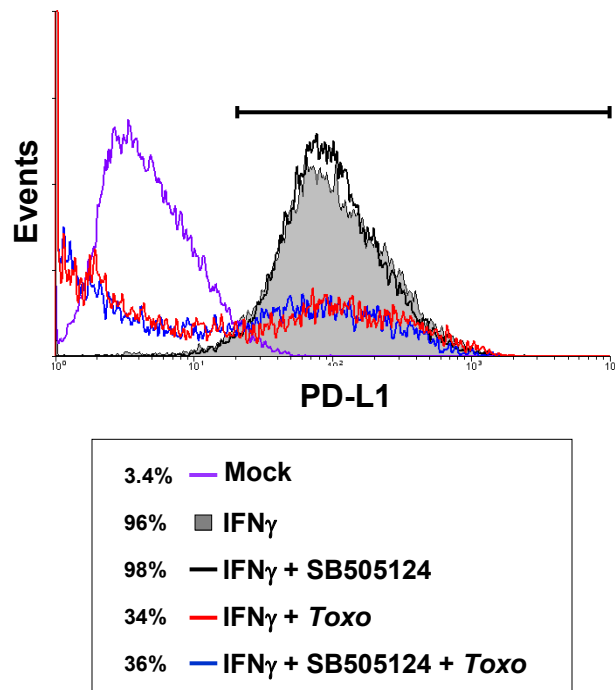

**Supplemental Figure S2: Inhibition of ALK4,5,7 Signaling Does Not Effect *Toxoplasma* Signaling to Host Cell.** Vehicle- or SB505124-inhibited cells were infected with GFP<sup>+</sup> parasites and 6 hours later exposed to IFN $\gamma$ . After 24 hours, cells were harvested and stained to detect surface-exposed PD-L1. Histogram represents PD-L1 expression on parasite-infected (GFP<sup>+</sup>) cells. Percentages shown represent the number of events within the gate, which determined by isotype staining controls (not shown).

**A.**

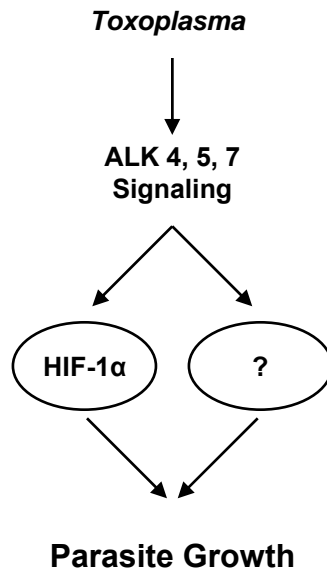

**B.**

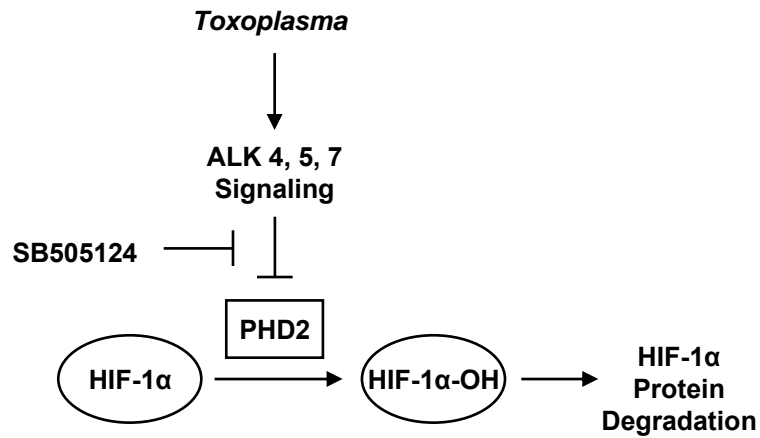

**Supplemental Figure S3: Model for ALK4,5,7 Signaling in *Toxoplasma* Infections.** A). ALK4,5,7 downstream signaling is important for *Toxoplasma* growth by regulating HIF-1 $\alpha$  and potentially other pathways. B). *Toxoplasma* activates HIF-1 $\alpha$  by ALK4,5,7-dependent decreases in PHD2 protein levels.
